# Supplementary material for: Predicting optimal endotracheal tube size and depth in pediatric patients using demographic data and machine learning techniques
Source: PubMed Central journal article supplement — Korean J Anesthesiol. 2023 Sep 26;76(6):540–9. doi: 10.4097/kja.23501 (PMC10718635; doi:10.4097/kja.23501), 2023-09-26
Supplement: kja-23501-Supplementary-Fig-3.pdf [file kja-23501-Supplementary-Fig-3.pdf]

(A)

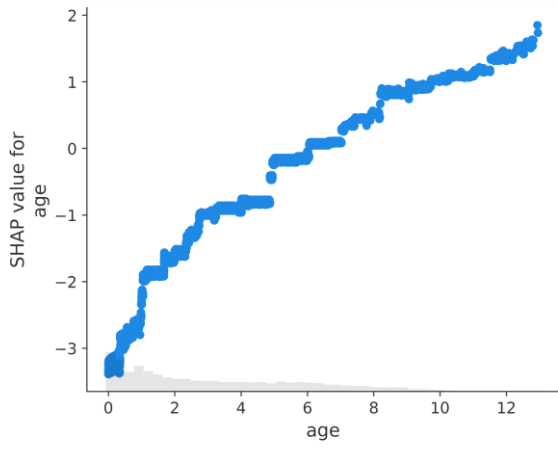

(B)

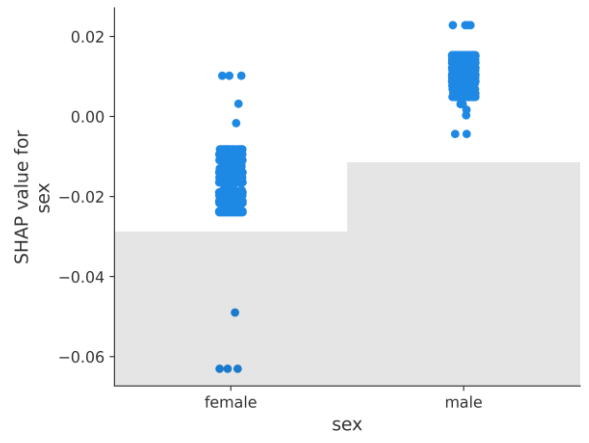

(C)

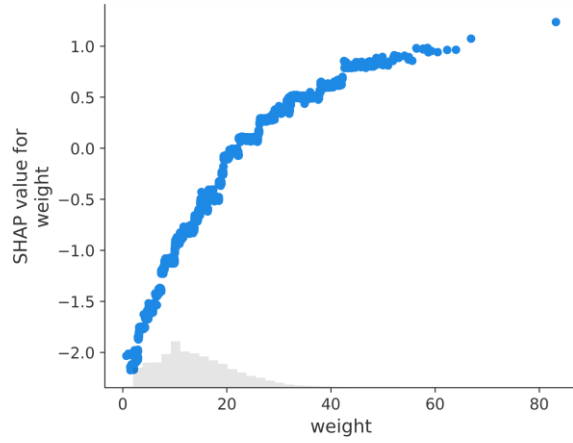

(D)

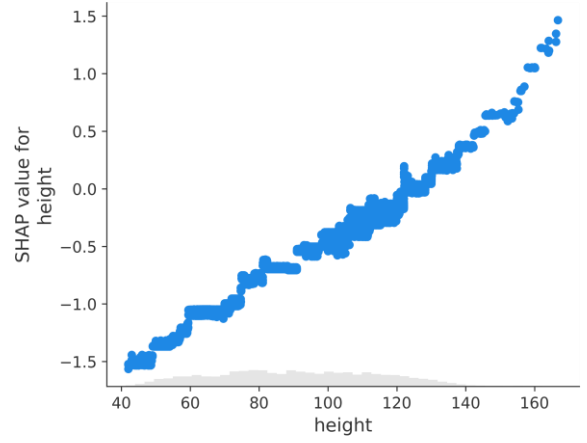

(E)

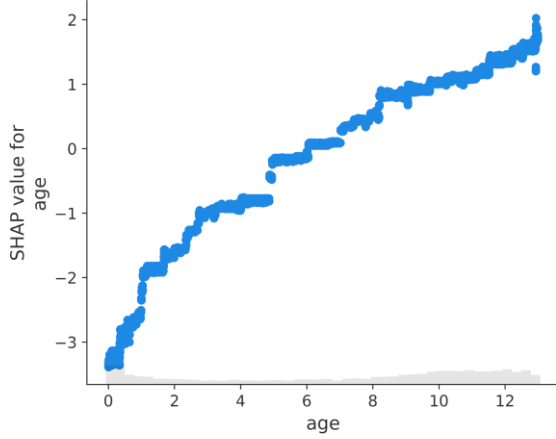

(F)

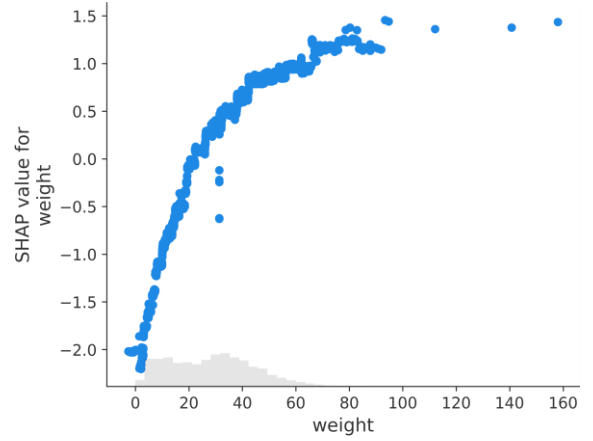

(G)

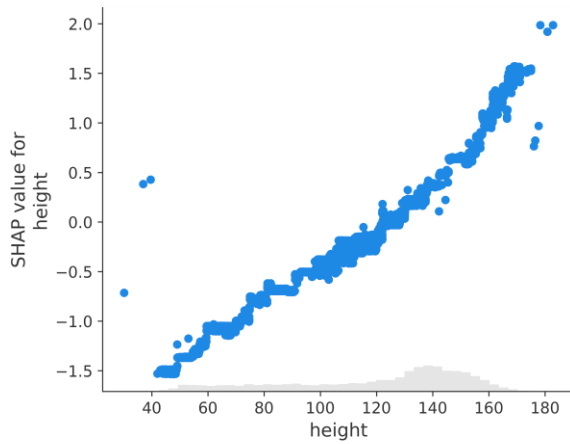

Supplementary Fig. 3. Shapley additive explanation dependence plot for each input variable in the gradient boosted regression tree (GBRT) model for predicting the depth of uncuffed ETTs: (A) age, (B) sex, (C) weight, and (D) height. Shapley additive explanation dependence plot for each input variable in the GBRT model for predicting the depth of cuffed ETTs: (E) age, (F) weight, and (G) height. Effect of a feature on the model's output and the distribution of the feature's value is visualized as a scatter plot in the Shapley dependence plot. The horizontal axis represents the value of each feature, and the vertical axis represents the Shapley values of a feature. The light grey area at the base of the plot represents a histogram displaying the distribution of data values.
